# Supplementary material
Source: publisher site journal article supplement (https://neobiota.pensoft.net/article/90473/download/suppl/36/)

**Supplementary material 6** for the article by Andrey N. Reshetnikov et al. “Rarely naturalized, but widespread and even invasive: the paradox of a popular pet terrapin expansion in Eurasia”.

Journal: NeoBiota.

Corresponding author: Andrey N. Reshetnikov

e-mail: anreshetnikov@yandex.ru

**Figure S2.** Background areas and available occurrence records (OR) used for Maxent models. Red and blue lines represent masks used to evaluate the two type of models: (a) the model of potential range of successful reproduction as an assessment of the probable area of population establishment; (b) the model of potential range of successful overwintering as a probable area of long-term survival of released individuals

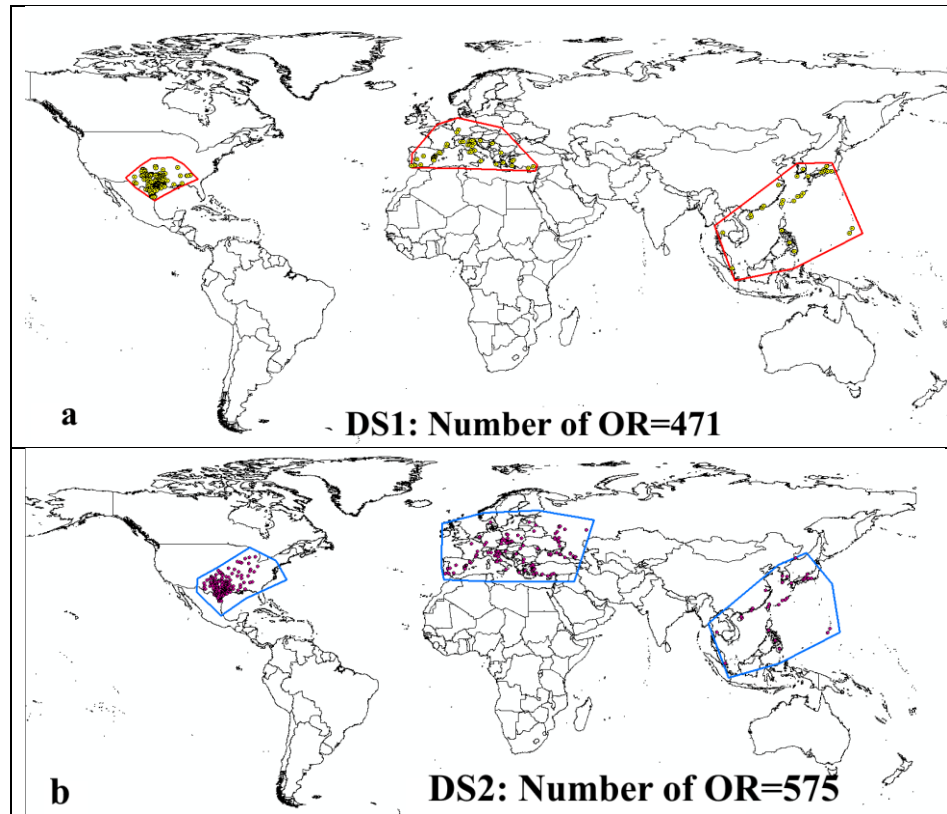

Supplement: Supplementary file 1
